# Supplementary material
Source: publisher figshare collection journal article supplement (https://gsajournals.figshare.com/ndownloader/files/28889421)
Supplement: Supplementary file 1 [file 28889421]

### General information

The numbering of baits and loci follows the numbering of contigs in the CLC assembly (ENA project accession PRJEB35099) from which they were derived. For example, CLC contig_2892421 is the source of bait sequences Bv-contig2892421 _0, Bv-contig2892421 _50, Bv-contig2892421 _100 and Bv-contig2892421 _150 (File S4) that jointly capture the mapped locus 2892421 (FileS6). That particular CLC contig has BLAST+ matches to *Sox*3 genes in *Glandirana rugosa* and *Bombina orientalis* (File S7)*.*

In Files S3 and S5, the following names are applied to the F0 and F1 samples (ENA sample accession after the comma):

BvvGP = *B. v. variegata* F0 male, ERS3926742

BbGP = *B. bombina* F0 female, ERS3926743

F1M = F1 male (sire for families 6 and 7), ERS5083645

F1Fam6F = F1 female (family 6), ERS5083565

F1Fam7F = F1 female (family 7), ERS5083646

### **File S2 Fast Vector (FastVec) Mathematica script**

### The FastVec v2.2beta.cdf script can be opened using the (free) Wolfram Player: <https://www.wolfram.com/player/>

### File S3 Lep-MAP3 input file

The Lep-MAP3 input file contains 4799 loci that were suitable for mapping. Starting with line 7, each line represents a locus. The first column contains the name of the cluster to which the locus was assigned in an initial graph-based clustering analysis. The second column is the locus name. Typically, these columns give the scaffold name and sequence position, respectively. Both columns are ignored by Lep-MAP3.

### FileS4 bait sequences

The DNA sequences for 20,000 baits (100 base long each) in fasta format, derived from the *B. v. variegata* CLC genome assembly. There are four baits per target. See also the general information above.

### **File S5 Diplotype matrix from FastVec analysis**

This file contains the output from the FastVec Mathematica script (File S2) for each of the 5000 enrichment targets (= loci). Maximum likelihood diplotypes for the F0 (*n* = 2), F1 (*n* = 3) and F2 (*n* = 162) generations are listed in columns labeled <sample_name>_HHHest. Support estimates are listed in columns labeled <sample_name>_HHHsup. See the general information above regarding the naming of F0 and F1 individuals.

### File S6 Linkage map file

A list of the 4755 mapped loci, sorted by linkage group (LG) and map position. Segregation distortion was estimated separately for families 6 and 7: ‘chisqr_fam#’ = χ2 estimate, ‘df_fam#’ = degrees of freedom associated with χ2. ‘fdr_fam#’ = FDR test significant (TRUE/FALSE). The critical value for the Bonferroni test (at experiment-wise α = 0.05, corrected for multiple comparisons, see publication) is 12.35. For the following three fields 0 = FALSE and 1 = TRUE: ‘rescored’ = locus was rescored based on manually selected variants; ‘js_add’ = locus was added to the map via the Lep-MAP3 JoinSingles2All module, with reduced stringency; ‘synt_stray’ = stray alignment in *X. tropicalis* synteny analysis. Annotations (0 if none exists): ‘ncbi’ = NCBI accessions (comma separated) with BLAST+ match in the CLC contig (BLAST+ data in FileS7). ‘ips’ = A comma-separated list of *B. v. variegata* transcripts that were used to scaffold the CLC contig associated with this locus and that also have InterProScan annotation (annotations in File S8).

### File S7 NCBI Blast+ records

BLAST+ matches to CLC contigs in standard tabular format, with the following added fields: gene description (column 2), query length (column 14) and subject length (column 15). It includes matches to three microsatellite markers that were used in previous *Bombina* hybrid zones analyses. Column ‘ncbi’ in File S6 links to these annotations.

### File S8 InterProScan records

The file provides Pfam annotations for *B. v. variegata* transcripts that are represented in the linkage map. The file has standard InterProScan tabular format:

1. Protein accession, 2. Sequence MD5 digest, 3. Sequence length, 4. Analysis, 5. Signature accession, 6. Signature description, 7. Start location, 8. Stop location, 9. Score (e-value), 10. Status of match (T: true), 10. Date of run, 11. InterPro annotations - accession, 12. InterPro annotations – Description.

Column ‘ips’ in File S6 links to these annotations.

**File S10 REPdenovo assembly**

The file in gzipped fasta format provides the assembly of *B. v. variegata* genomic repeats based on k-mers whose frequency in WGS reads exceeds the average k-mer frequency by a factor of 100 or more. We supply the unmerged version of this assembly that was used as a mapping reference to generate repeat-subtracted read sets.

**File S11 *B. variegata* mapping reference**

The file in gzipped fasta format contains the mapping reference for the 5000 target loci. Repeat-subtracted reads from bait-enriched libraries were mapped to this reference.

**Figure S9 Pairwise recombination fractions and LOD scores.**

Plots present the pairwise recombinations fractions (rf, left) and the pairwise LOD scores (right) for all 12 LGs. Data are from the reduced map of 2,022 loci and computed with OneMap v. 2.1.3.
